# Supplementary material for: Diagnostic model of saliva peptide finger print analysis of oral squamous cell carcinoma patients using weak cation exchange magnetic beads
Source: Oxford University Press journal article supplement (doi:10.1042/bsr20150023), 2015-05-12

## Supplementary Figure

The entire mass spectra of the extracted peptide samples from 40 OSCC patients and 23 healthy controls generated from the same instrument settings in the range 1000–10000 Da.

**A HC**

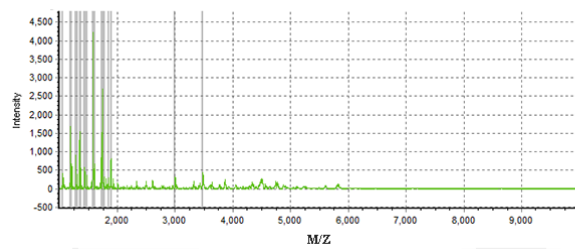

**B OSCC**

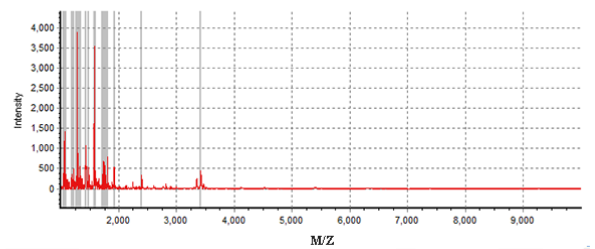

Supplement: bsr035e211add.pdf [file bsr035e211add.pdf]
